# Supplementary material for: Quantifying black carbon light absorption enhancement by a novel statistical approach
Source: Copernicus journal article supplement (doi:10.5194/acp-2017-582), 2017-07-20
Supplement: Supplementary file 1 [file acp-2017-582-supplement.pdf]

1        *Supplement of* **Quantifying black carbon light absorption**  
2        **enhancement by a novel statistical approach**

3  
4        **Cheng Wu<sup>1,2</sup>, Dui Wu<sup>1,2,3</sup>, Jian Zhen Yu<sup>4,5,6</sup>**

5  
6        [1] Institute of Mass Spectrometer and Atmospheric Environment, Jinan University,  
7        Guangzhou 510632, China

8        [2] Guangdong Provincial Engineering Research Center for on-line source apportionment  
9        system of air pollution, Guangzhou 510632, China

10       [3] Institute of Tropical and Marine Meteorology, China Meteorological Administration,  
11       Guangzhou 510080, China

12       [4] Division of Environment, Hong Kong University of Science and Technology, Clear Water  
13       Bay, Hong Kong, China

14       [5] Atmospheric Research Centre, Fok Ying Tung Graduate School, Hong Kong University  
15       of Science and Technology, Nansha, China

16       [6] Department of Chemistry, Hong Kong University of Science and Technology, Clear Water  
17       Bay, Hong Kong, China

18       *Corresponding to:* Cheng Wu ([wucheng.vip@foxmail.com](mailto:wucheng.vip@foxmail.com)) and Jian Zhen Yu ([jian.yu@ust.hk](mailto:jian.yu@ust.hk))

21  
22 This SI contains five tables and nineteen figures.

23

## 24 **Uncertainty of $E_{abs}$ estimation**

25 The uncertainty of  $E_{abs}$  estimation depends on uncertainty propagation from MAE uncertainty,  
26 which can be calculated from (Harris, 2010):

$$27 \quad MAE_{Unc} = MAE \times \sqrt{\left(\frac{\sigma_{abs,Unc}}{\sigma_{abs}}\right)^2 + \left(\frac{EC_{Unc}}{EC}\right)^2} \quad S1$$

$$28 \quad E_{abs,Unc} = E_{abs} \times \sqrt{\left(\frac{MAE_{Unc}}{MAE}\right)^2 + \left(\frac{MAE_{p,Unc}}{MAE_p}\right)^2} \quad S2$$

29

## 30 **Descriptions of customized programs used in this study for data analysis and** 31 **visualization**

32 Several computer programs were developed to meet specific research purpose in this study. All  
33 the programs are based on Igor Pro (www.wavemetrics.com) that provides a friendly GUI. Brief  
34 descriptions are given below.

35

### 36 **MRS program (Igor Pro based)**

37 The program (Figure S15) is written in Igor Pro (WaveMetrics, Inc. Lake Oswego, OR, USA)  
38 to feasible MRS calculation via a user-friendly GUI. The MRS application is not limited in  
39 SOC estimation, but can also be extended to other applications (e.g.  $E_{abs}$  estimation) as long as  
40 a reliable tracer is available.

41 MRS calculation can be done by different temporal cycles (batch calculation): by year, by  
42 year&season, by season, by year&month, by month, by year&month&hour. Data filter is also  
43 available to calculate MRS on a specific subset of data.

44 The program is available from <https://sites.google.com/site/wuchengust>.

45

### 46 **Mie program and source code written in Igor Pro**

47 A computer program (Figure S16) written in Igor Pro (WaveMetrics, Inc. Lake Oswego, OR,  
48 USA) for Mie scattering calculation. Both BHMIE and BHCOAT (coated particles)  
49 algorithms(Bohren and Huffman, 1983) are included. The program is also capable of batch  
50 calculation for both algorithms. Available from <https://sites.google.com/site/wuchengust>.

51

## 52 **Aethalometer data processing program (Igor Pro based)**

53 This handy tool (Figure S17) can perform different corrections (e.g. Weingartner, Virkkula) on  
54 Aethalometer data. Raw Aethalometer data suffers from several artifacts including filter matrix  
55 effect (multiple scattering), loading effect (shadowing) and scattering effect. Careful  
56 corrections are needed for reporting light absorption coefficient from attenuation measurement.  
57 This Igor based program can directly import Aethalometer raw data and perform corrections  
58 (algorithm can be selected by user). Results can be exported to .csv files. Extra information  
59 including statistics of sensor voltage from each channel, sampling flow rate, etc are plotted for  
60 a quick QA/QC check. Available from <https://sites.google.com/site/wuchengust>.

61

## 62 **Histbox program (Igor Pro based)**

63 A handy tool (Figure S18) to generate histogram and box plots with many powerful features.  
64 Data can be sorted by different time scale and batch plotting is available. Available from  
65 <https://sites.google.com/site/wuchengust>.

66

## 67 **Scatter plot program**

68 Scatter plot (Figure S19) is a handy tool to maximize the efficiency of data visualization in  
69 atmospheric science. The program includes Deming, WODR and York algorithm for linear  
70 regression, which consider uncertainties in both X and Y, that is more realistic for atmospheric  
71 applications. It is Igor based, and packed with lots of useful features for data analysis and graph  
72 plotting, including batch plotting, data masking via GUI, color coding in Z axis, data filtering  
73 and grouping. Available from <https://sites.google.com/site/wuchengust>.

74

75

## 76 Reference

- 77 Andreae, M. O., Schmid, O., Yang, H., Chand, D., Yu, J. Z., Zeng, L. M., and Zhang, Y. H.:  
78 Optical properties and chemical composition of the atmospheric aerosol in urban Guangzhou,  
79 China, *Atmos. Environ.*, 42, 6335-6350, doi: 10.1016/j.atmosenv.2008.01.030, 2008.
- 80 Bohren, C. F. and Huffman, D. R.: *Absorption and scattering of light by small particles*, Wiley,  
81 New York, xiv, 530 p. pp., 1983.
- 82 Chan, T. W., Brook, J. R., Smallwood, G. J., and Lu, G.: Time-resolved measurements of black  
83 carbon light absorption enhancement in urban and near-urban locations of southern Ontario,  
84 Canada, *Atmos. Chem. Phys.*, 11, 10407-10432, 2011.
- 85 Chow, J. C., Watson, J. G., Doraiswamy, P., Chen, L. W. A., Sodeman, D. A., Lowenthal, D.  
86 H., Park, K., Arnott, W. P., and Motallebi, N.: Aerosol light absorption, black carbon, and  
87 elemental carbon at the Fresno Supersite, California, *Atmos Res*, 93, 874-887, doi: DOI  
88 10.1016/j.atmosres.2009.04.010, 2009.
- 89 Chuang, P. Y., Duvall, R. M., Bae, M. S., Jefferson, A., Schauer, J. J., Yang, H., Yu, J. Z., and  
90 Kim, J.: Observations of elemental carbon and absorption during ACE-Asia and implications  
91 for aerosol radiative properties and climate forcing, *J. Geophys. Res.*, 108, 8634, doi: Doi  
92 10.1029/2002jd003254, 2003.
- 93 Doran, J. C., Barnard, J. C., Arnott, W. P., Cary, R., Coulter, R., Fast, J. D., Kassianov, E. I.,  
94 Kleinman, L., Laulainen, N. S., Martin, T., Paredes-Miranda, G., Pekour, M. S., Shaw, W. J.,  
95 Smith, D. F., Springston, S. R., and Yu, X. Y.: The T1-T2 study: evolution of aerosol properties  
96 downwind of Mexico City, *Atmos. Chem. Phys.*, 7, 1585-1598, doi: 10.5194/acp-7-1585-2007,  
97 2007.
- 98 Harris, D. C.: *Quantitative chemical analysis*, 8th ed., W.H. Freeman and Co., New York, 2010.
- 99 Knox, A., Evans, G. J., Brook, J. R., Yao, X., Jeong, C. H., Godri, K. J., Sabaliauskas, K., and  
100 Slowik, J. G.: Mass Absorption Cross-Section of Ambient Black Carbon Aerosol in Relation  
101 to Chemical Age, *Aerosol. Sci. Technol.*, 43, 522-532, doi: Doi 10.1080/02786820902777207,  
102 2009.
- 103 Lack, D. A. and Cappa, C. D.: Impact of brown and clear carbon on light absorption  
104 enhancement, single scatter albedo and absorption wavelength dependence of black carbon,  
105 *Atmos. Chem. Phys.*, 10, 4207-4220, doi: DOI 10.5194/acp-10-4207-2010, 2010.
- 106 Lan, Z.-J., Huang, X.-F., Yu, K.-Y., Sun, T.-L., Zeng, L.-W., and Hu, M.: Light absorption of  
107 black carbon aerosol and its enhancement by mixing state in an urban atmosphere in South  
108 China, *Atmos. Environ.*, 69, 118-123, doi: <http://dx.doi.org/10.1016/j.atmosenv.2012.12.009>,  
109 2013.
- 110 Liu, D., Flynn, M., Gysel, M., Targino, A., Crawford, I., Bower, K., Choularton, T., Jurányi,  
111 Z., Steinbacher, M., Hüglin, C., Curtius, J., Kampus, M., Petzold, A., Weingartner, E.,  
112 Baltensperger, U., and Coe, H.: Single particle characterization of black carbon aerosols at a  
113 tropospheric alpine site in Switzerland, *Atmos. Chem. Phys.*, 10, 7389-7407, doi: 10.5194/acp-  
114 10-7389-2010, 2010.
- 115 Mayol-Bracero, O. L., Gabriel, R., Andreae, M. O., Kirchstetter, T. W., Novakov, T., Ogren,  
116 J., Sheridan, P., and Streets, D. G.: Carbonaceous aerosols over the Indian Ocean during the  
117 Indian Ocean Experiment (INDOEX): Chemical characterization, optical properties, and  
118 probable sources, *J. Geophys. Res.*, 107, 8030, doi: Doi 10.1029/2000jd000039, 2002.
- 119 Moosmuller, H., Chakrabarty, R. K., Ehlers, K. M., and Arnott, W. P.: Absorption Angstrom  
120 coefficient, brown carbon, and aerosols: basic concepts, bulk matter, and spherical particles,  
121 *Atmos. Chem. Phys.*, 11, 1217-1225, doi: DOI 10.5194/acp-11-1217-2011, 2011.
- 122 Pandolfi, M., Cusack, M., Alastuey, A., and Querol, X.: Variability of aerosol optical properties  
123 in the Western Mediterranean Basin, *Atmos. Chem. Phys.*, 11, 8189-8203, doi: DOI  
124 10.5194/acp-11-8189-2011, 2011.

125 Thompson, J. E., Hayes, P. L., Jimenez, K. A. J. L., Zhang, X., Liu, J., Weber, R. J., and Buseck,  
126 P. R.: Aerosol Optical Properties at Pasadena, CA During CalNex 2010, *Atmos Environ*, doi:  
127 10.1016/j.atmosenv.2012.03.011, 2012.  
128 Wang, Q., Huang, R., Zhao, Z., Cao, J., Ni, H., Tie, X., Zhu, C., Shen, Z., Wang, M., and Dai,  
129 W.: Effects of photochemical oxidation on the mixing state and light absorption of black carbon  
130 in the urban atmosphere of China, *Environmental Research Letters*, 12, 044012, 2017.  
131 Wang, Q. Y., Huang, R. J., Cao, J. J., Han, Y. M., Wang, G. H., Li, G. H., Wang, Y. C., Dai,  
132 W. T., Zhang, R. J., and Zhou, Y. Q.: Mixing State of Black Carbon Aerosol in a Heavily  
133 Polluted Urban Area of China: Implications for Light Absorption Enhancement, *Aerosol. Sci.*  
134 *Technol.*, 48, 689-697, doi: 10.1080/02786826.2014.917758, 2014.  
135 Xu, J., Bergin, M. H., Yu, X., Liu, G., Zhao, J., Carrico, C. M., and Baumann, K.: Measurement  
136 of aerosol chemical, physical and radiative properties in the Yangtze delta region of China,  
137 *Atmos. Environ.*, 36, 161-173, 2002.  
138 Yang, M., Howell, S. G., Zhuang, J., and Huebert, B. J.: Attribution of aerosol light absorption  
139 to black carbon, brown carbon, and dust in China - interpretations of atmospheric measurements  
140 during EAST-AIRE, *Atmos. Chem. Phys.*, 9, 2035-2050, 2009.

141

142

Table S1. Comparison of Mass absorption efficiency (MAE) at various locations. For literature MAE values at different wavelengths rather than 550nm, an estimated MAE<sub>550</sub> is given in the brackets following equations given by Moosmuller et al. (2011) assuming AAE of 1.

| Location                                | Type                            | Sampling Duration | Inlet             | $\lambda$ (nm) | $\sigma_{\text{abs}}$ Instrument | EC determination protocol | $\sigma_{\text{abs}} \pm 1 \text{ S.D.}$ (Mm <sup>-1</sup> ) | EC mass ( $\mu\text{g m}^{-3}$ ) | estimated MAE <sub>p</sub> <sup>*</sup> (m <sup>2</sup> g <sup>-1</sup> ) | observed MAE (m <sup>2</sup> g <sup>-1</sup> ) |              | Reference                    |
|-----------------------------------------|---------------------------------|-------------------|-------------------|----------------|----------------------------------|---------------------------|--------------------------------------------------------------|----------------------------------|---------------------------------------------------------------------------|------------------------------------------------|--------------|------------------------------|
|                                         |                                 |                   |                   |                |                                  |                           |                                                              |                                  |                                                                           | arithmetic mean $\pm 1 \text{ S.D.}$           | Gaussian fit |                              |
| Guangzhou, China                        | Suburban                        | 2012.2-2013.1     | PM <sub>2.5</sub> | 550            | AE                               | NIOSH_TOT                 | 42.20±29.41                                                  | 2.63±2.27                        | 13*                                                                       | 19.02±6.60                                     | 16.16        | This study                   |
| Shenzhen, China                         | Urban                           | 2011.8-9          | PM <sub>2.5</sub> | 532            | PAS                              | LII                       | 25.4±19.0                                                    | 4.0±3.1                          | /                                                                         | 6.5±0.5[6.29±0.48]                             | /            | (Lan et al., 2013)           |
| Xi'an, China                            | Urban                           | 2012.12-2013.1    | PM <sub>2.5</sub> | 870            | PAS                              | LII                       | /                                                            | 8.8±7.3                          | 7.17[11.34]                                                               | /                                              | 7.62[12.05]  | (Wang et al., 2014)          |
| Xi'an, China                            | Urban                           | 2013.2            | PM <sub>2.5</sub> | 532            | PAS                              | LII                       | /                                                            | /                                | /                                                                         | 14.6±5.6                                       | 12.7         | (Wang et al., 2017)          |
| Guangzhou, China                        | Urban                           | 2004.10           | PM <sub>2.5</sub> | 532            | PAS                              | NIOSH_TOT                 | 91±60                                                        | 7.1                              | 7.7[7.44]                                                                 | /                                              | /            | (Andreae et al., 2008)       |
| Fresno, USA                             | Urban                           | 2005.8-9          | PM <sub>2.5</sub> | 532            | PAS                              | IMPROVE_A_TOR             | 5.06                                                         | 1.01                             | /                                                                         | 6.1±2.5[5.9±2.42]                              | /            | (Chow et al., 2009)          |
|                                         |                                 |                   |                   |                |                                  | NIOSH_TOT                 | /                                                            | 0.58                             | /                                                                         | 9.3±2.4[8.99±2.32]                             | /            |                              |
| T1, Mexico city, Mexico                 | Suburban                        | 2006.3            | PM <sub>2.5</sub> | 870            | PAS                              | NIOSH_TOT                 | /                                                            | /                                | /                                                                         | 9.2~9.7***[14.55~15.34]                        | /            | (Doran et al., 2007)         |
| Pasadena, USA                           | Urban                           | 2010.5-6          | PM <sub>2.5</sub> | 532            | AM                               | NIOSH_TOT                 | 3.8±3.4                                                      | 0.6~0.7                          | 5.7[5.51]                                                                 | /                                              | /            | (Thompson et al., 2012)      |
| Toronto, Canada                         | Urban                           | 2006.12-2007.1    | PM <sub>2.5</sub> | 760            | PAS                              | NIOSH_TOT                 | /                                                            | /                                | 6.9~9.1**<br>[9.53~12.57]                                                 | 9.3~9.9[12.85~13.68]                           | /            | (Knox et al., 2009)          |
| Toronto, Canada                         | Suburban                        |                   |                   |                |                                  |                           | 3~6                                                          | 0.10~0.14                        | /                                                                         | 30~43[42.6~61.06]                              | /            |                              |
| Windsor, Canada                         | Urban                           | 2007.8            | PM <sub>2.5</sub> | 781            | PAS                              | LII                       | 4.4±2.9                                                      | 0.27±0.23                        | /                                                                         | 16±1[22.72±1.42]                               | /            | (Chan et al., 2011)          |
| Ottawa, Canada                          | Urban                           |                   |                   |                |                                  |                           | 26±17                                                        | 1.7±0.9                          | /                                                                         | 15±3[21.3±4.26]                                | /            |                              |
| Beijing, China                          | Rural                           | 2005.3            | /                 | 550            | AE                               | NIOSH_TOT                 | /                                                            | /                                | 9.5                                                                       | 11.3                                           | /            | (Yang et al., 2009)          |
| Montseny, Spin (Mediterranean)          | Rural                           | 2009.11-2010.10   | PM <sub>10</sub>  | 637            | MAAP                             | NIOSH_TOT                 | 2.8±2.2                                                      | /                                | 10.4[12.04]                                                               | /                                              | /            | (Pandolfi et al., 2011)      |
| Jungfraujoeh, Switzerland (high alpine) | Rural                           | 2007.2-3          | /                 | 637            | MAAP                             | LII                       | /                                                            | /                                | /                                                                         | 10.2±3.2[11.81±3.71]                           | /            | (Liu et al., 2010)           |
| Lin'an, China                           | Rural                           | 1999.11           | PM <sub>2.5</sub> | 550            | PSAP                             | NIOSH_TOT                 | 23±14                                                        | 3.4±1.7                          | /                                                                         | 8.6±7.0                                        | /            | (Xu et al., 2002)            |
| Jeju Island, Korea                      | Coastal Rural, (East China Sea) | 2001.4            | PM <sub>10</sub>  | 550            | PSAP                             | NIOSH_TOT                 | /                                                            | /                                | /                                                                         | 12.6±2.6                                       | /            | (Chuang et al., 2003)        |
| Maldives                                | Oceanic rural                   | 1999.2-3          | PM <sub>3</sub>   | 550            | PSAP                             | EGA                       | 62±34                                                        | 2.5±1.4                          | 6.6                                                                       | 8.1                                            | /            | (Mayol-Bracero et al., 2002) |

\*Determined by Minimum R Squared method; \*\* Median values;

AE:Aethalometer ; PAS photo acoustic spectrometer; MAAP: Multi Angle Absorption Photometer; PSAP: particle soot absorption photometer; AM: albedo meter; LII: Laser induced incandescence

Table S2. Statistics of monthly MAE<sub>550nm</sub>

| Month    | 95th  | 75th  | 50th  | 25th  | 5th   | Mean  | Max   | Min   | S.D. | N   |
|----------|-------|-------|-------|-------|-------|-------|-------|-------|------|-----|
| Feb-2012 | 31.29 | 22.04 | 18.12 | 15.74 | 13.90 | 19.72 | 47.73 | 8.50  | 5.78 | 533 |
| Mar-2012 | 28.33 | 19.80 | 17.48 | 15.92 | 13.77 | 18.78 | 45.56 | 10.98 | 4.92 | 663 |
| Apr-2012 | 33.06 | 22.66 | 18.24 | 16.11 | 13.85 | 20.21 | 48.29 | 6.01  | 6.23 | 595 |
| May-2012 | 33.74 | 23.35 | 19.61 | 17.17 | 14.73 | 21.22 | 48.40 | 6.33  | 5.99 | 533 |
| Jun-2012 | 39.73 | 27.17 | 21.76 | 18.72 | 15.04 | 23.70 | 49.07 | 5.62  | 7.37 | 333 |
| Jul-2012 | 35.96 | 24.62 | 19.12 | 15.64 | 12.71 | 21.14 | 49.63 | 9.23  | 7.65 | 609 |
| Aug-2012 | 42.94 | 27.99 | 22.01 | 16.24 | 12.55 | 23.50 | 49.95 | 9.75  | 8.98 | 556 |
| Sep-2012 | 33.15 | 21.11 | 17.61 | 15.25 | 12.99 | 19.31 | 49.54 | 10.39 | 6.18 | 684 |
| Oct-2012 | 20.72 | 15.84 | 13.95 | 12.60 | 11.18 | 14.70 | 34.09 | 7.34  | 3.21 | 715 |
| Nov-2012 | 28.64 | 18.67 | 15.53 | 13.72 | 11.95 | 17.18 | 48.41 | 8.34  | 5.58 | 506 |
| Dec-2012 | 29.92 | 19.32 | 15.74 | 13.67 | 11.78 | 17.39 | 48.73 | 9.33  | 5.86 | 591 |
| Jan-2013 | 21.60 | 16.24 | 14.48 | 13.03 | 11.79 | 15.33 | 48.48 | 7.16  | 3.97 | 709 |

Table S3. Statistics of monthly AAE<sub>470-660</sub>

| Month    | 95th | 75th | 50th | 25th | 5th  | Mean | Max  | Min  | S.D. | N   |
|----------|------|------|------|------|------|------|------|------|------|-----|
| Feb-2012 | 1.41 | 1.25 | 1.17 | 1.09 | 0.94 | 1.17 | 1.70 | 0.78 | 0.14 | 533 |
| Mar-2012 | 1.31 | 1.17 | 1.08 | 1.00 | 0.92 | 1.09 | 1.45 | 0.68 | 0.12 | 663 |
| Apr-2012 | 1.16 | 1.07 | 1.01 | 0.95 | 0.83 | 1.00 | 1.35 | 0.56 | 0.10 | 587 |
| May-2012 | 1.11 | 1.03 | 0.99 | 0.93 | 0.85 | 0.98 | 1.21 | 0.50 | 0.09 | 530 |
| Jun-2012 | 1.17 | 1.09 | 1.03 | 0.97 | 0.88 | 1.02 | 1.29 | 0.39 | 0.10 | 333 |
| Jul-2012 | 1.19 | 1.09 | 1.03 | 0.97 | 0.84 | 1.03 | 1.38 | 0.47 | 0.11 | 604 |
| Aug-2012 | 1.16 | 1.08 | 1.03 | 0.97 | 0.88 | 1.02 | 1.30 | 0.64 | 0.08 | 556 |
| Sep-2012 | 1.21 | 1.11 | 1.04 | 0.98 | 0.90 | 1.05 | 1.37 | 0.68 | 0.10 | 684 |
| Oct-2012 | 1.25 | 1.15 | 1.07 | 1.01 | 0.93 | 1.08 | 1.36 | 0.84 | 0.10 | 715 |
| Nov-2012 | 1.22 | 1.14 | 1.09 | 1.03 | 0.97 | 1.09 | 1.45 | 0.88 | 0.08 | 506 |
| Dec-2012 | 1.31 | 1.21 | 1.15 | 1.09 | 0.99 | 1.15 | 1.41 | 0.92 | 0.09 | 591 |
| Jan-2013 | 1.36 | 1.25 | 1.17 | 1.11 | 1.00 | 1.18 | 1.63 | 0.90 | 0.11 | 709 |

Table S4. Statistics of monthly SSA

| Month    | 95th | 75th | 50th | 25th | 5th  | Mean | Max  | Min  | S.D. | N   |
|----------|------|------|------|------|------|------|------|------|------|-----|
| Feb-2012 | 0.91 | 0.89 | 0.87 | 0.84 | 0.79 | 0.86 | 0.94 | 0.65 | 0.04 | 530 |
| Mar-2012 | 0.91 | 0.89 | 0.86 | 0.83 | 0.77 | 0.85 | 0.95 | 0.42 | 0.05 | 660 |
| Apr-2012 | 0.92 | 0.89 | 0.86 | 0.83 | 0.76 | 0.85 | 0.94 | 0.45 | 0.06 | 552 |
| May-2012 | 0.92 | 0.90 | 0.87 | 0.83 | 0.74 | 0.85 | 0.94 | 0.45 | 0.06 | 532 |
| Jun-2012 | 0.92 | 0.89 | 0.86 | 0.81 | 0.74 | 0.85 | 0.95 | 0.64 | 0.06 | 328 |
| Jul-2012 | 0.91 | 0.87 | 0.83 | 0.79 | 0.71 | 0.83 | 0.95 | 0.57 | 0.06 | 602 |
| Aug-2012 | 0.94 | 0.92 | 0.89 | 0.85 | 0.79 | 0.88 | 0.96 | 0.67 | 0.05 | 547 |
| Sep-2012 | 0.94 | 0.91 | 0.88 | 0.84 | 0.75 | 0.87 | 0.96 | 0.55 | 0.06 | 682 |
| Oct-2012 | 0.94 | 0.93 | 0.91 | 0.89 | 0.84 | 0.90 | 0.96 | 0.66 | 0.03 | 715 |
| Nov-2012 | 0.91 | 0.89 | 0.87 | 0.83 | 0.75 | 0.85 | 0.94 | 0.18 | 0.06 | 506 |
| Dec-2012 | 0.91 | 0.89 | 0.86 | 0.82 | 0.74 | 0.85 | 0.94 | 0.66 | 0.05 | 591 |
| Jan-2013 | 0.91 | 0.89 | 0.87 | 0.85 | 0.79 | 0.86 | 0.93 | 0.64 | 0.04 | 709 |

Table S5. Statistics of monthly  $E_{\text{abs550}}$

| Month    | 95th | 75th | 50th | 25th | 5th  | Mean | Max  | Min  | S.D. | N   |
|----------|------|------|------|------|------|------|------|------|------|-----|
| Feb-2012 | 2.24 | 1.57 | 1.29 | 1.12 | 0.99 | 1.41 | 3.41 | 0.61 | 0.41 | 533 |
| Mar-2012 | 1.76 | 1.23 | 1.09 | 0.99 | 0.86 | 1.17 | 2.83 | 0.68 | 0.31 | 663 |
| Apr-2012 | 2.45 | 1.68 | 1.35 | 1.19 | 1.03 | 1.50 | 3.58 | 0.44 | 0.46 | 595 |
| May-2012 | 2.50 | 1.73 | 1.45 | 1.27 | 1.09 | 1.57 | 3.58 | 0.47 | 0.44 | 533 |
| Jun-2012 | 2.74 | 1.87 | 1.50 | 1.29 | 1.04 | 1.63 | 3.38 | 0.39 | 0.51 | 333 |
| Jul-2012 | 2.95 | 2.02 | 1.57 | 1.28 | 1.04 | 1.73 | 4.07 | 0.76 | 0.63 | 609 |
| Aug-2012 | 3.61 | 2.35 | 1.85 | 1.36 | 1.05 | 1.97 | 4.20 | 0.82 | 0.75 | 556 |
| Sep-2012 | 2.53 | 1.61 | 1.34 | 1.16 | 0.99 | 1.47 | 3.78 | 0.79 | 0.47 | 684 |
| Oct-2012 | 1.87 | 1.43 | 1.26 | 1.14 | 1.01 | 1.32 | 3.07 | 0.66 | 0.29 | 715 |
| Nov-2012 | 2.31 | 1.51 | 1.25 | 1.11 | 0.96 | 1.39 | 3.90 | 0.67 | 0.45 | 506 |
| Dec-2012 | 2.54 | 1.64 | 1.33 | 1.16 | 1.00 | 1.47 | 4.13 | 0.79 | 0.50 | 591 |
| Jan-2013 | 1.83 | 1.38 | 1.23 | 1.10 | 1.00 | 1.30 | 4.11 | 0.61 | 0.34 | 709 |



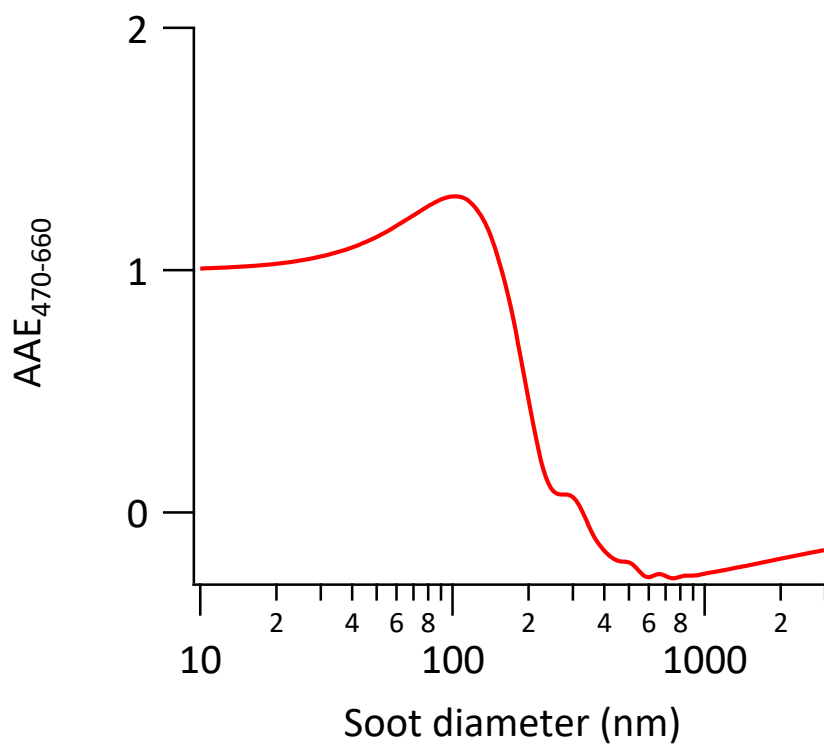

Figure S1. Mie simulated  $AAE_{470-660}$  of a bare soot particle as a function of diameter with a Refractive index of  $1.85 - 0.71i$ .

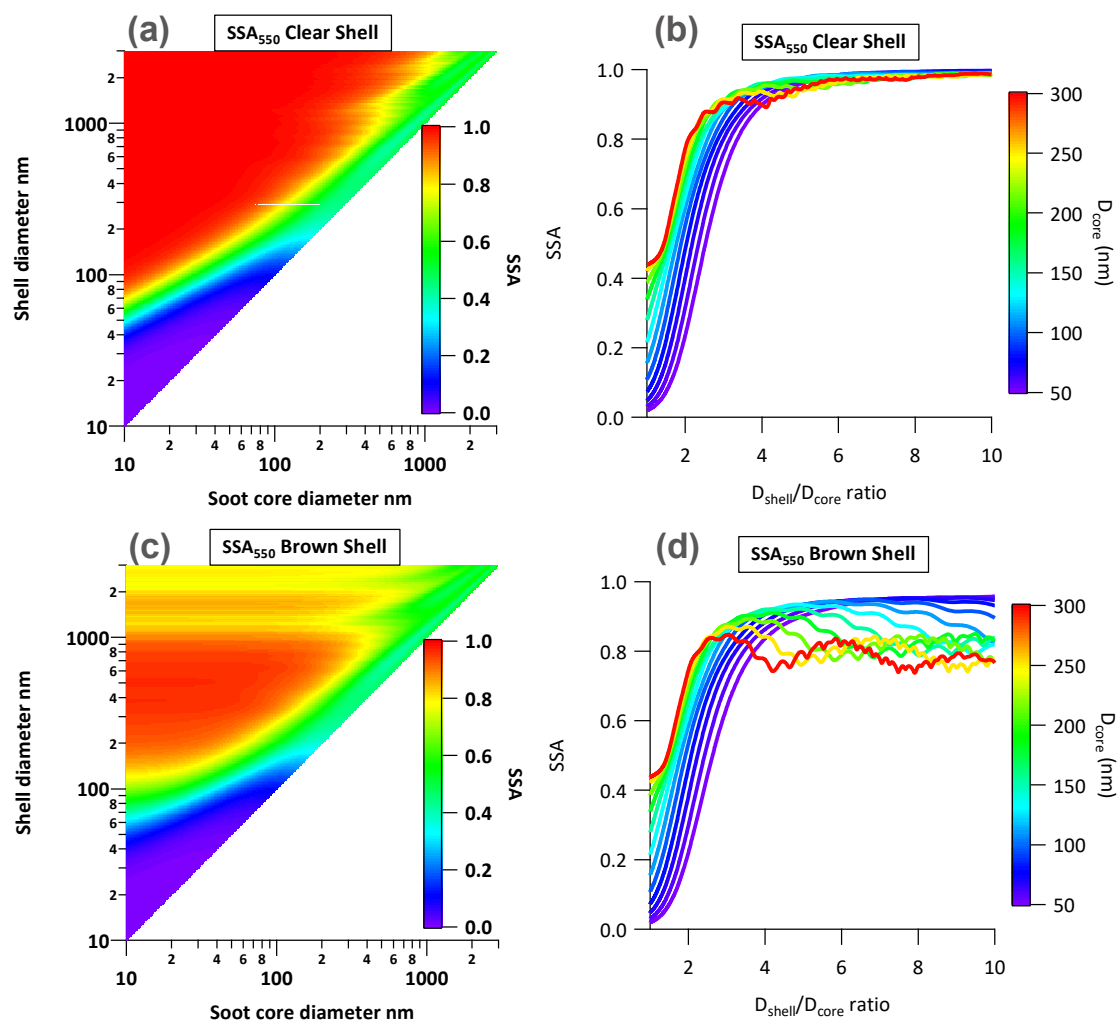

Figure S2. Mie simulated size dependency of soot particles SSA at wavelength 550 nm. (a) Combination of different shell (y axis) and core diameters (x axis). The color coding represents the SSA of a particle with specific core and shell size; (b) Cross-sections views of (a). The color coding represents different  $D_{core}$  in the range of 50 – 300 nm. (c) Combination of different shell (y axis) and core diameters (x axis). The color coding represents the  $E_{abs}$  of a particle with specific core and shell size; (d) Cross-sections views of (c). The color coding represents different diameters of soot core in the range of 50 – 300 nm.

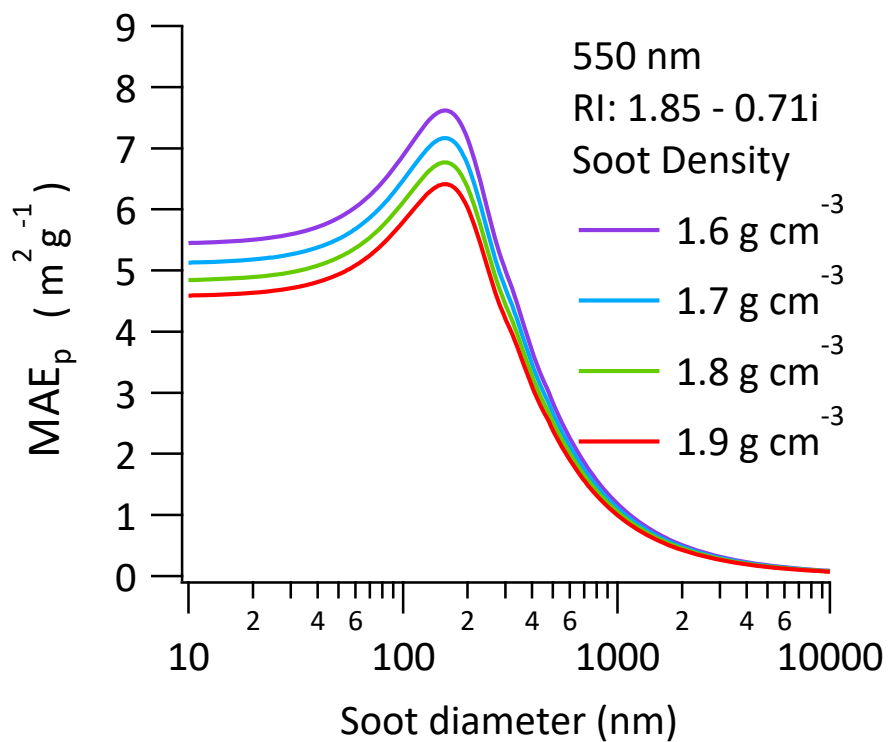

Figure S3. Mie simulated mass absorption efficiency (MAE<sub>p</sub>) of a bare soot particle as a function of diameter at a wavelength of 550nm. Refractive index is 1.85 – 0.71i and density varied from 1.6 to 1.9 g cm<sup>-3</sup>.

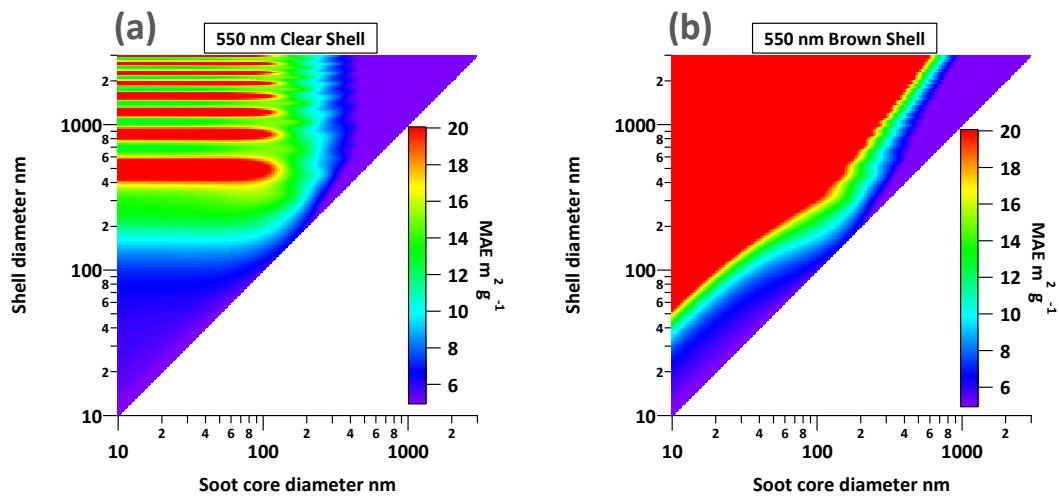

Figure S4 Mie simulated mass absorption efficiency (MAE) of a bare soot particle as a function of diameter at a wavelength of 550nm. Refractive index is  $1.85 - 0.71i$  and density is  $1.9 \text{ g cm}^{-3}$  for soot core. Refractive index for clear coating is 1.55. Refractive index for brown coating is wavelength dependent adopted from Lack and Cappa (Lack and Cappa, 2010).

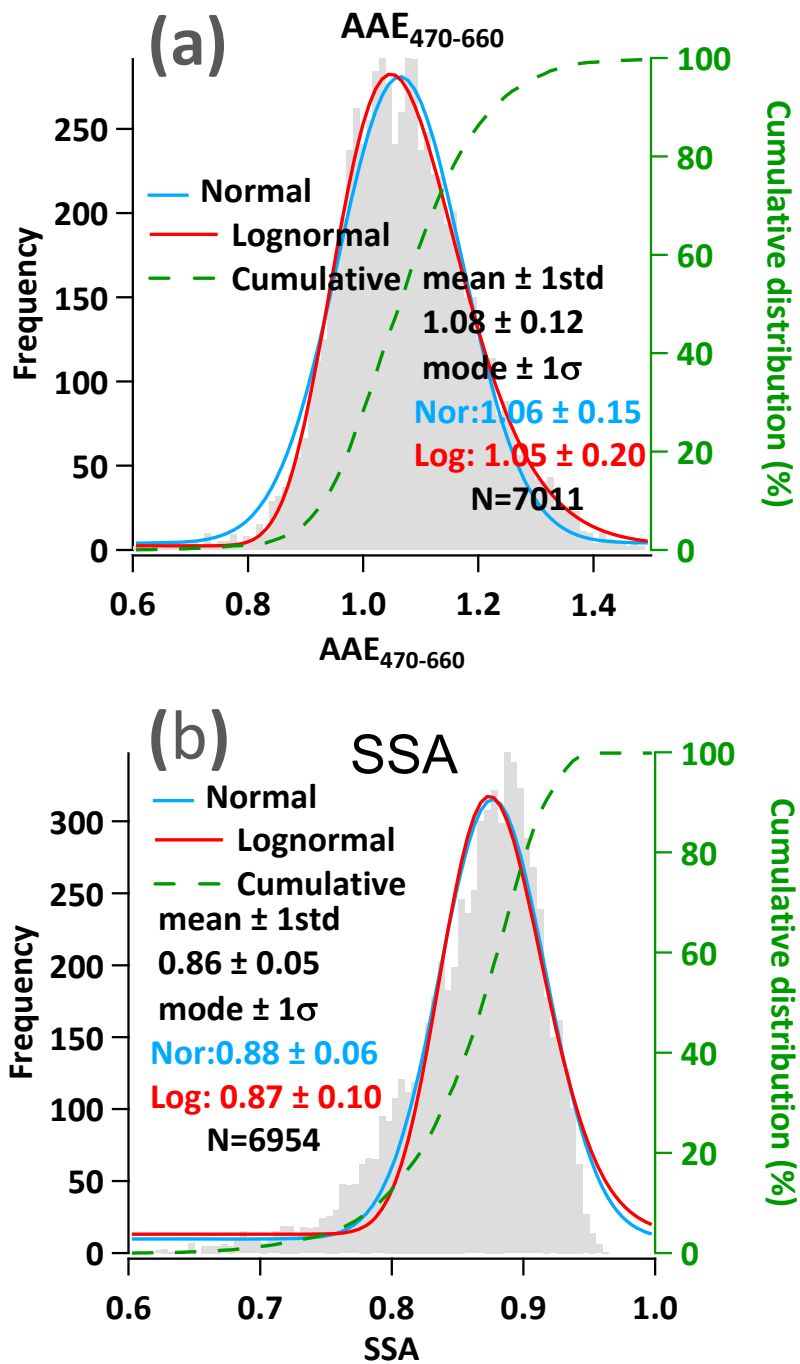

Figure S5. Measured annual statistics of AAE<sub>470-660</sub>, and SSA. (a) Annual frequency distribution of AAE at 550 nm. (b) Annual frequency distribution of SSA. The blue and red line represent normal and lognormal fitting curve respectively.

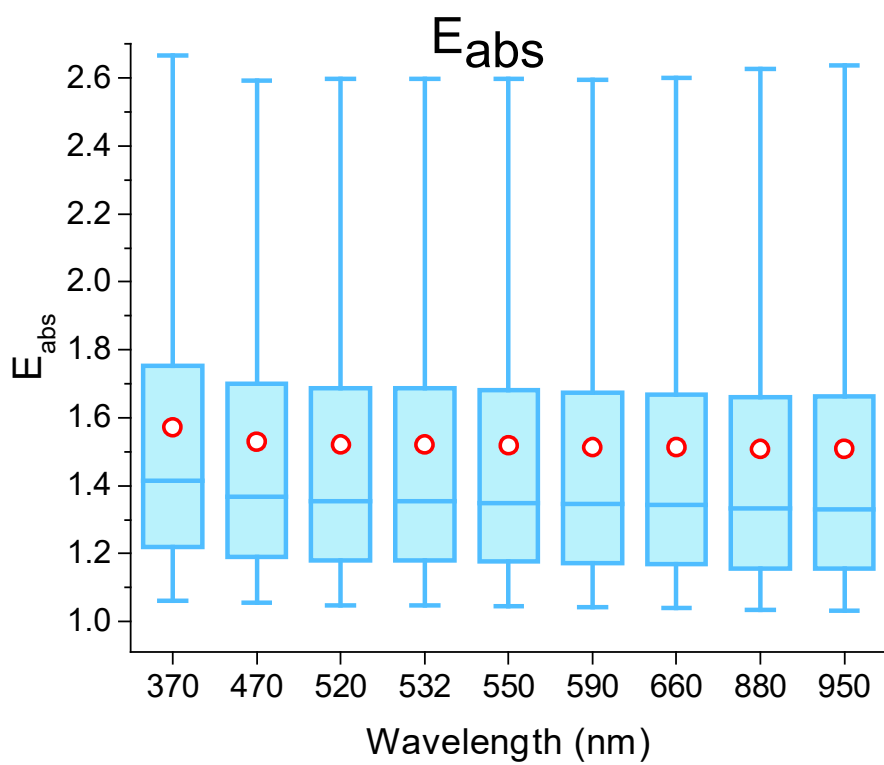

| Wavelength (nm) | 370  | 470  | 520  | 532  | 550  | 590  | 660  | 880  | 950  |
|-----------------|------|------|------|------|------|------|------|------|------|
| $E_{abs}$ mean  | 1.57 | 1.53 | 1.52 | 1.52 | 1.52 | 1.51 | 1.51 | 1.51 | 1.51 |
| $E_{abs}$ S.D.  | 0.52 | 0.51 | 0.51 | 0.51 | 0.51 | 0.51 | 0.52 | 0.53 | 0.53 |

Figure S6. Spectrum annual average  $E_{abs}$  from 370 to 950 nm.

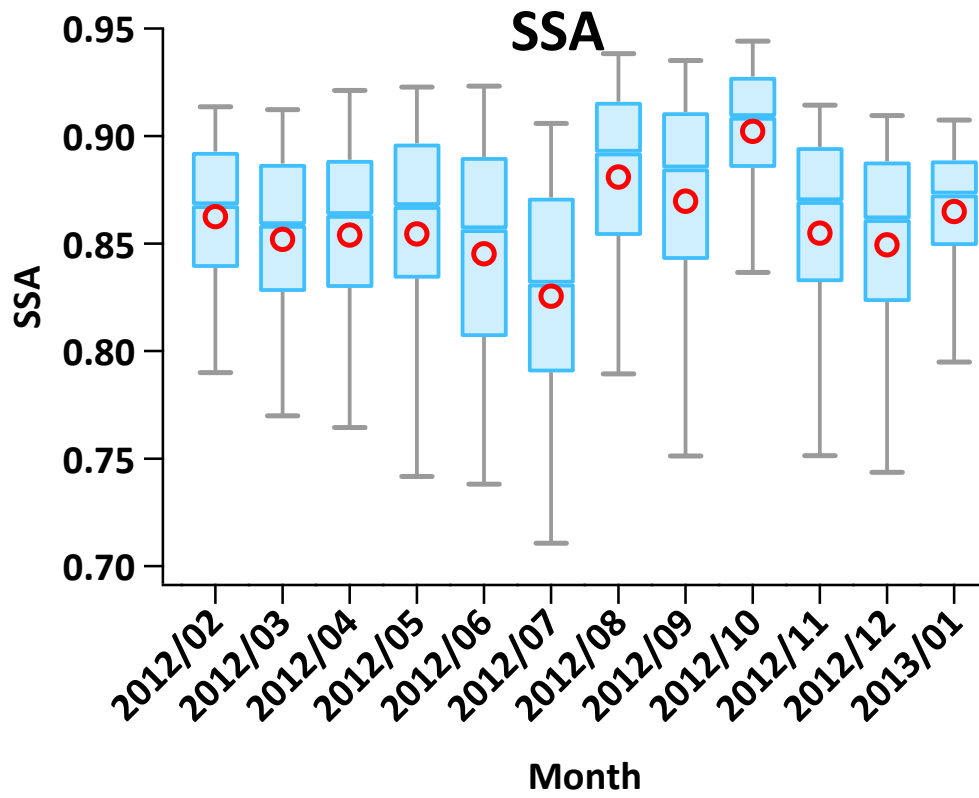

Figure S7. Measured monthly variations of SSA.

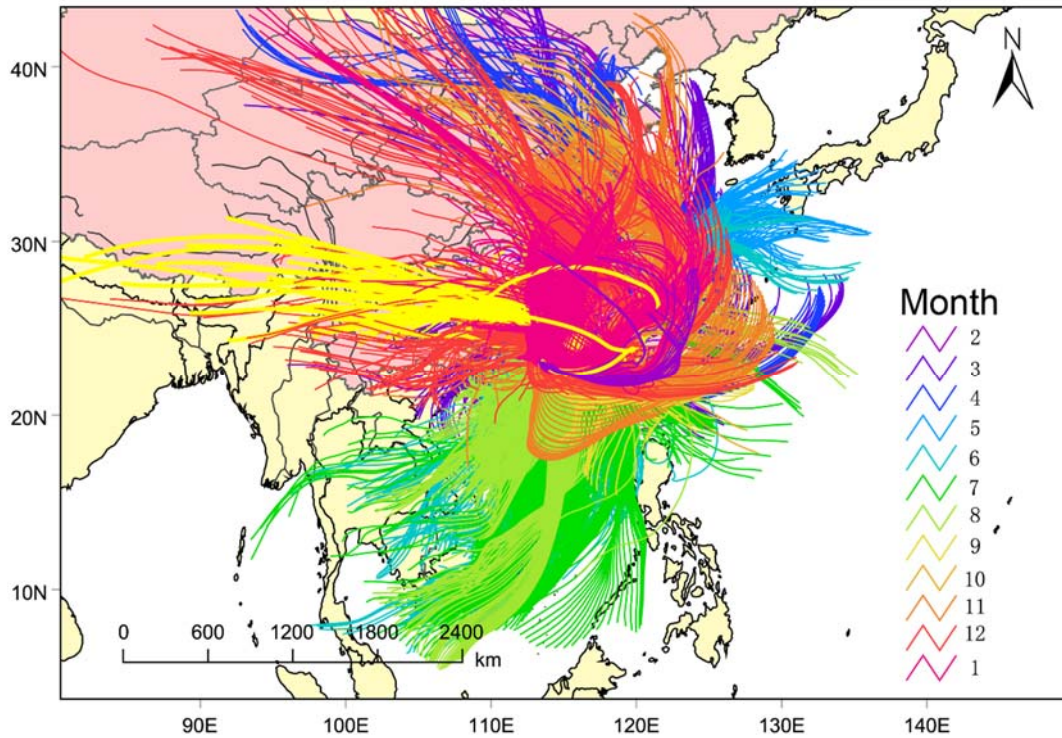

Figure S8. Hourly back trajectories for the past 72 hours calculated using NOAA's HYSPLIT model from Feb 2012 to Jan 2013. The color coding represents different months.

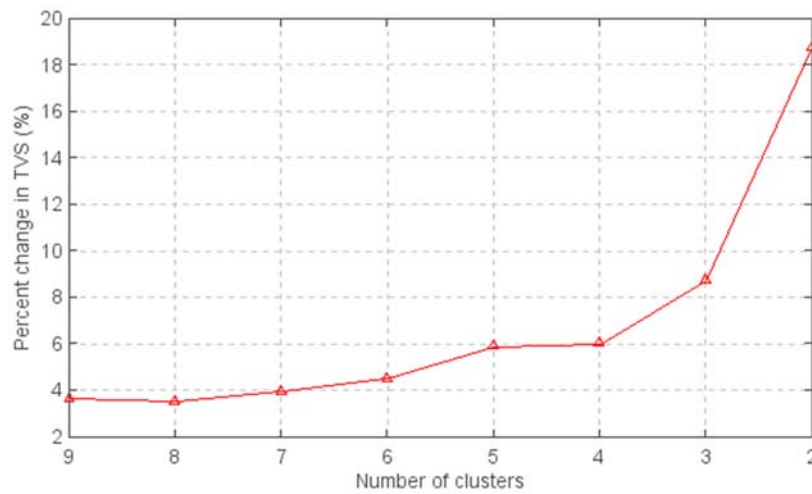

Figure S9. Total spatial variance (TSV) as a function of number of clusters in back trajectories clustering analysis.



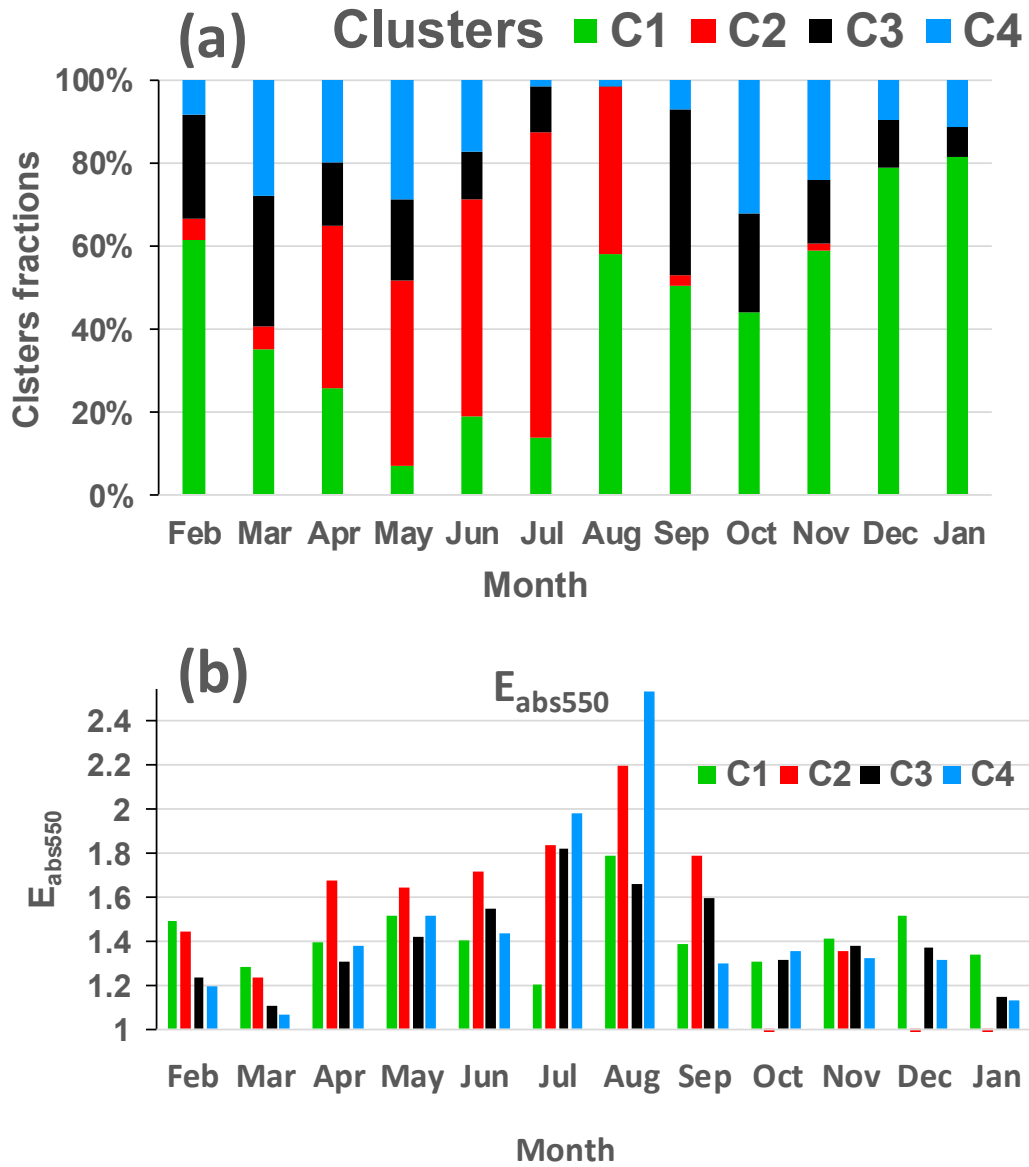

Figure S10. (a) Monthly contribution of each cluster. (b) Monthly  $E_{\text{abs550}}$  of each cluster.

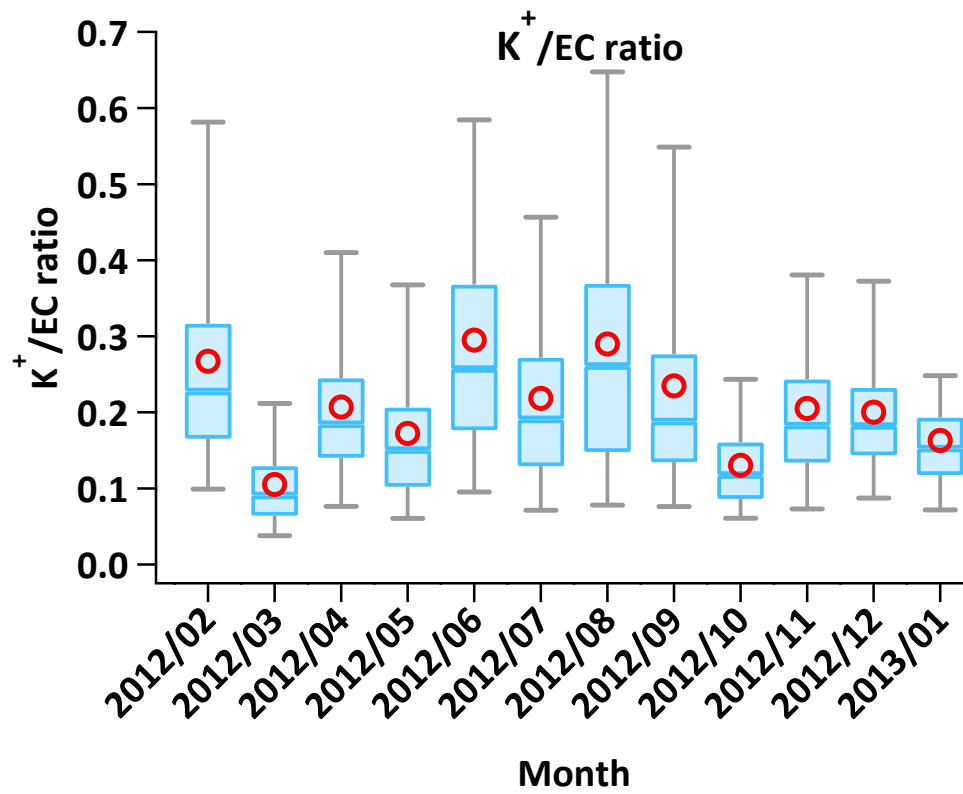

Figure S11. Monthly variations of K<sup>+</sup>/EC ratio from 2012 Feb to 2013 Jan at NC site.

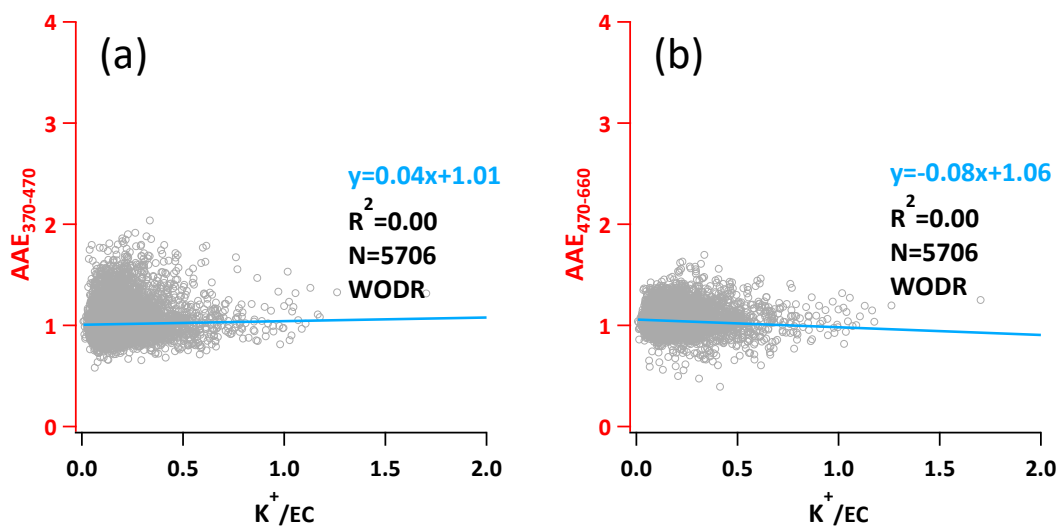

Figure S12. Correlations of AAE with  $K^+ / EC$  ratio (biomass burning indicator). (a) AAE from 370 – 470 nm. (b) AAE from 470 – 660 nm.

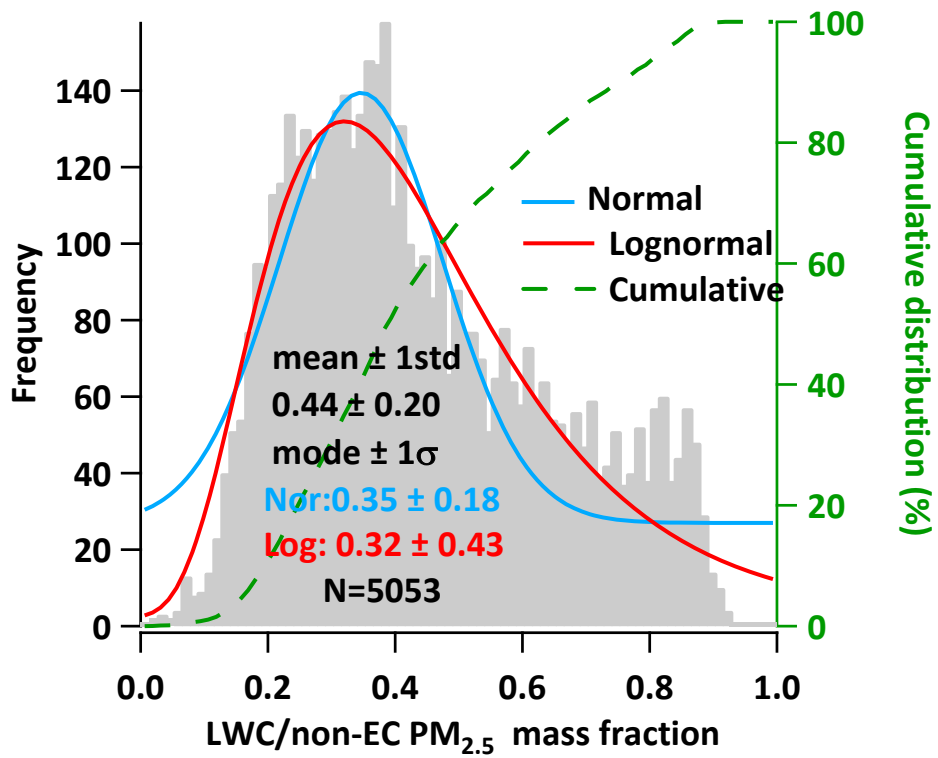

Figure S13. Annual frequency distribution of LWC/non-EC PM<sub>2.5</sub> mass fraction.

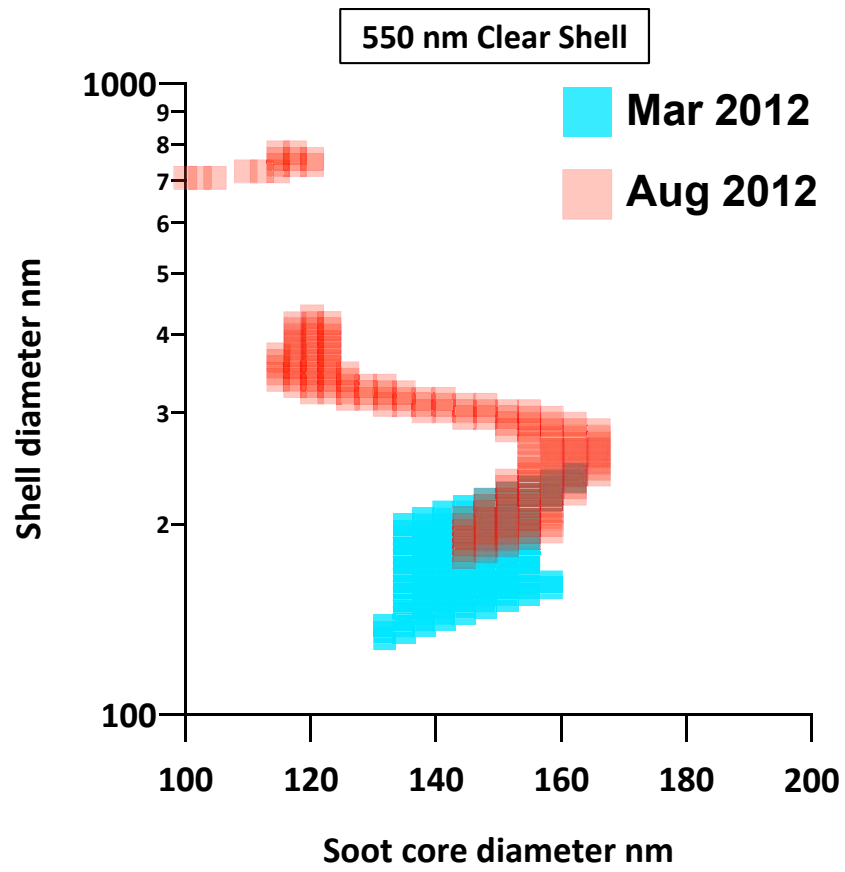

Figure S14. Size range of soot particles constrained by  $E_{\text{abs}}$  and  $AAE_{470-660}$  from measurements.

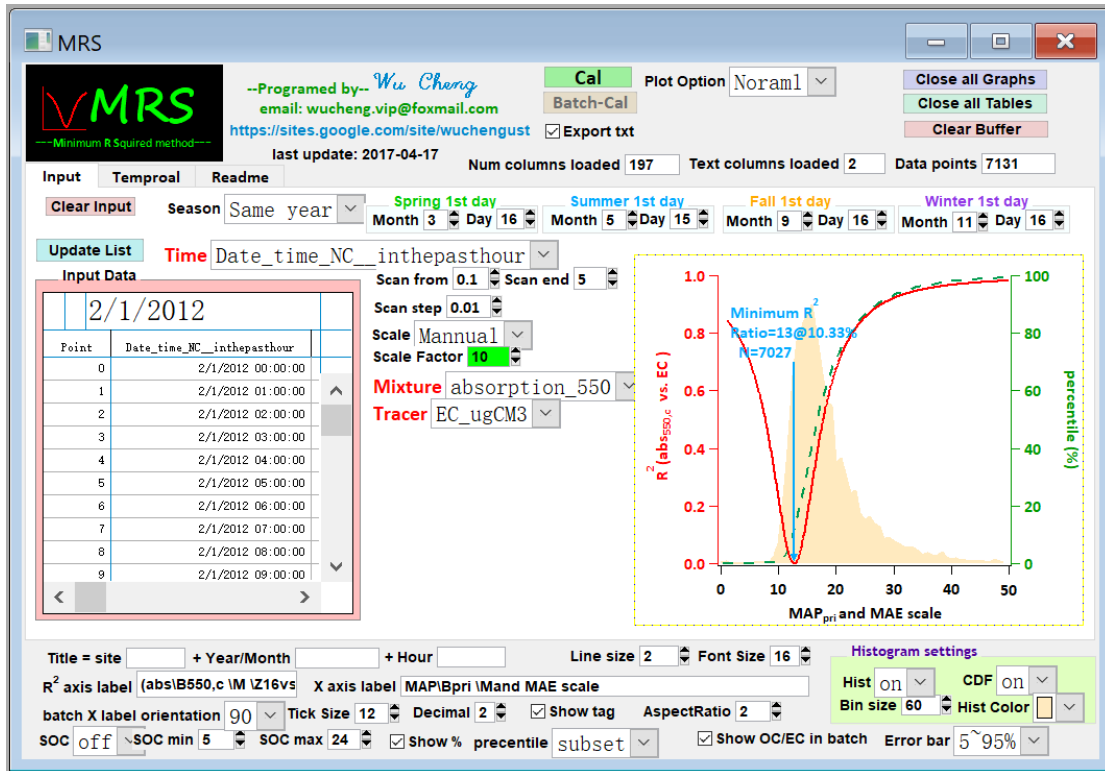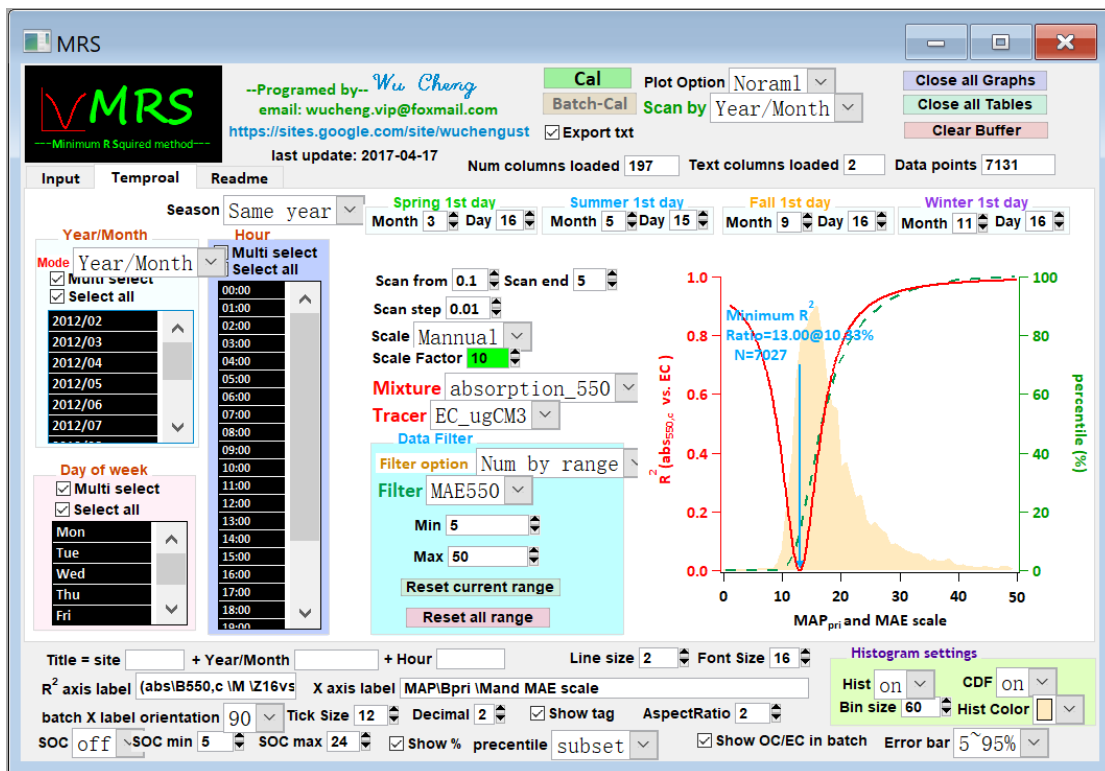

Figure S15. MRS program written in Igro Pro (WaveMetrics, Inc. Lake Oswego, OR, USA). Available from <https://sites.google.com/site/wuchengust>.

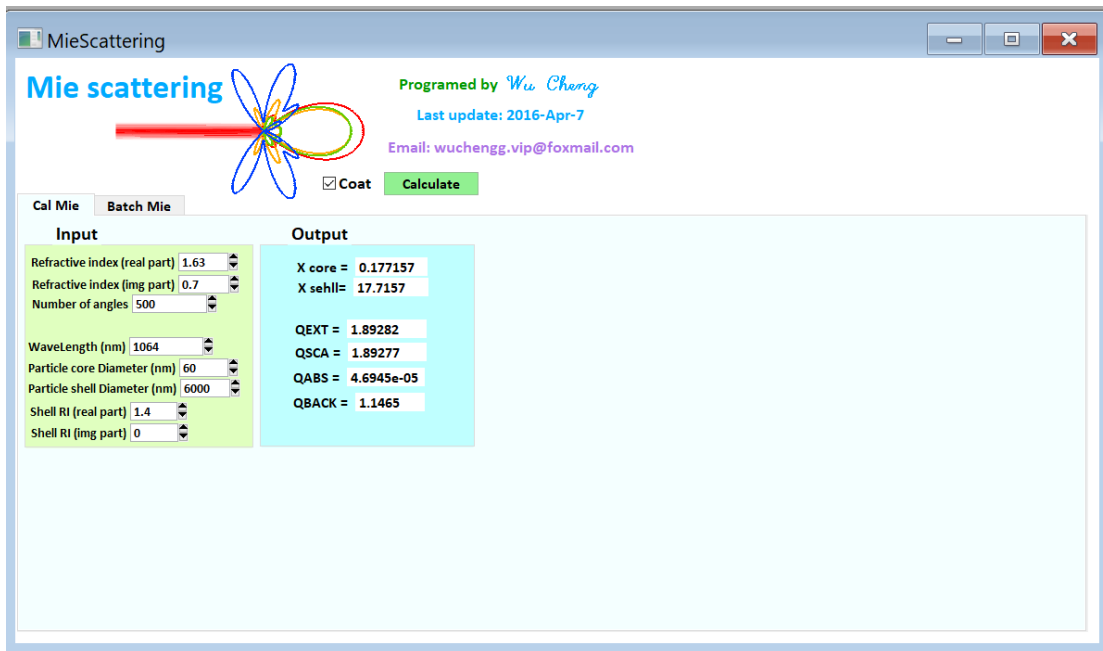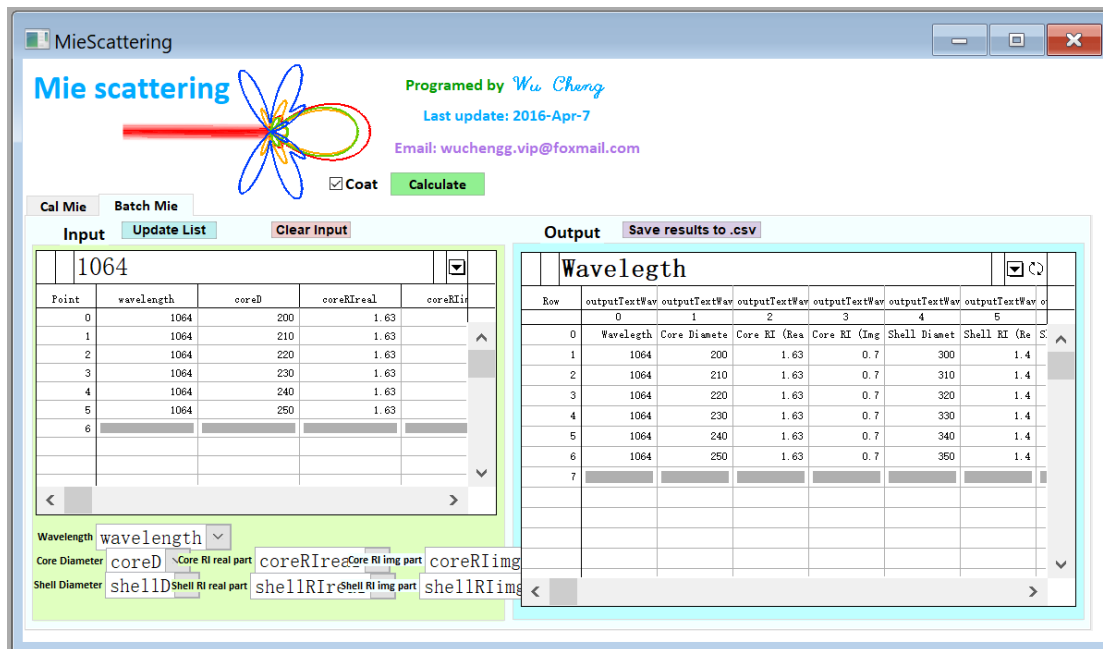

Figure S16. Mie program written in Igro Pro (WaveMetrics, Inc. Lake Oswego, OR, USA). Available from <https://sites.google.com/site/wuchengust>.

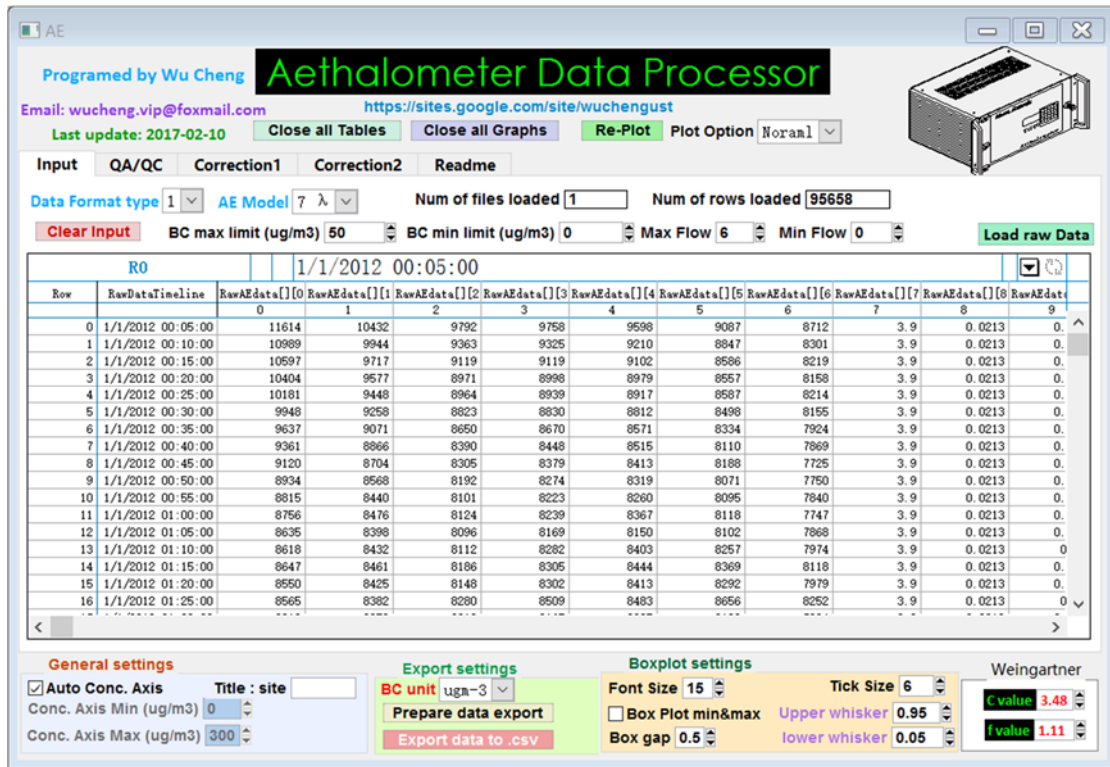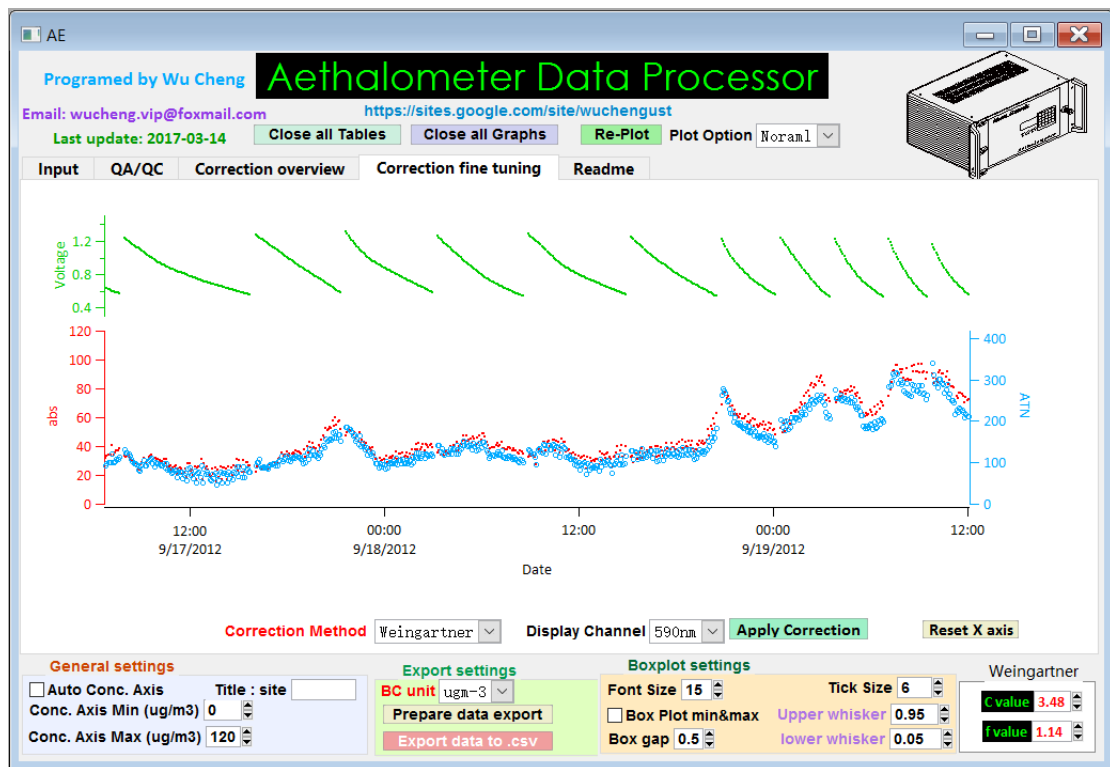

Figure S17. Aethalometer data processing program written in Igro Pro (WaveMetrics, Inc. Lake Oswego, OR, USA). Available from <https://sites.google.com/site/wuchengust>.



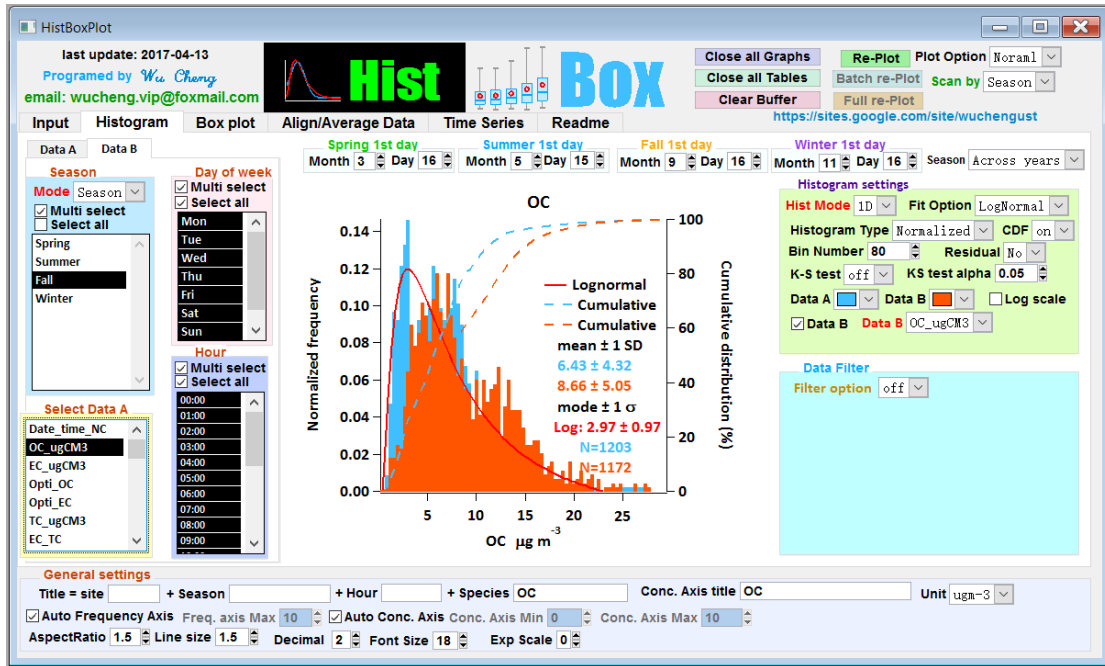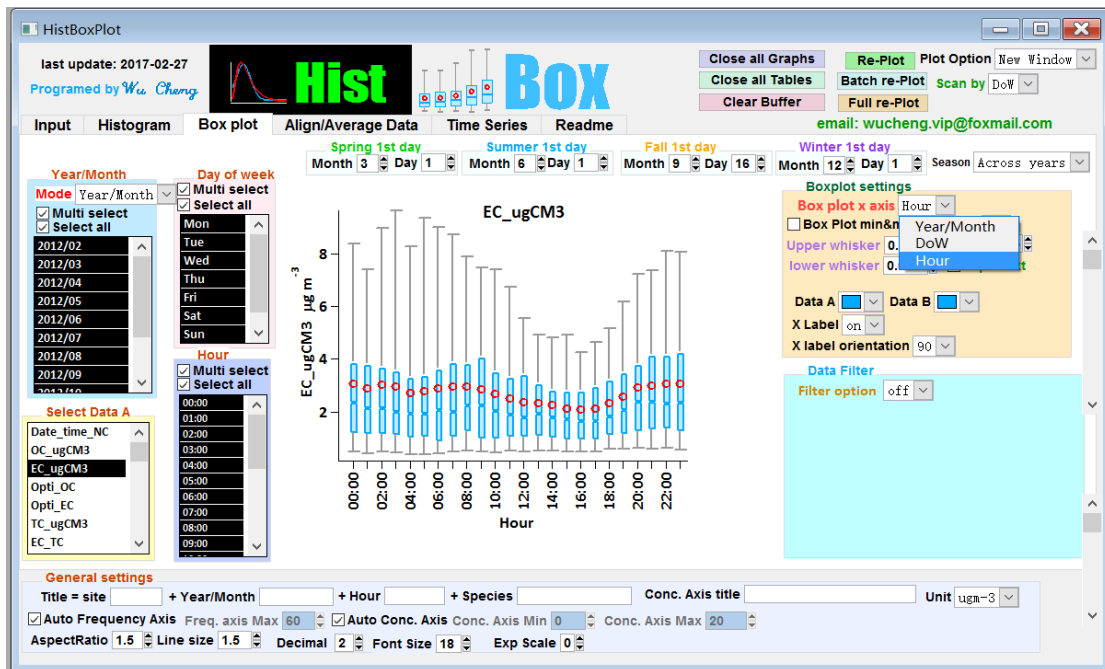

Figure S18. Histbox program written in Igró Pro (WaveMetrics, Inc. Lake Oswego, OR, USA). Available from <https://sites.google.com/site/wuchengust>.

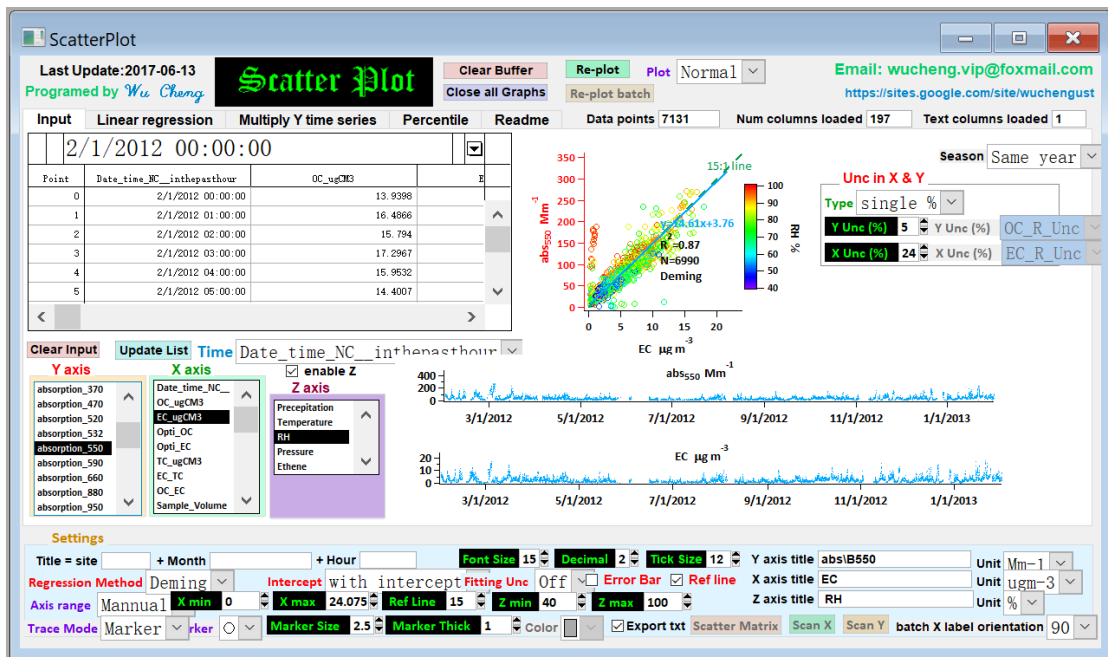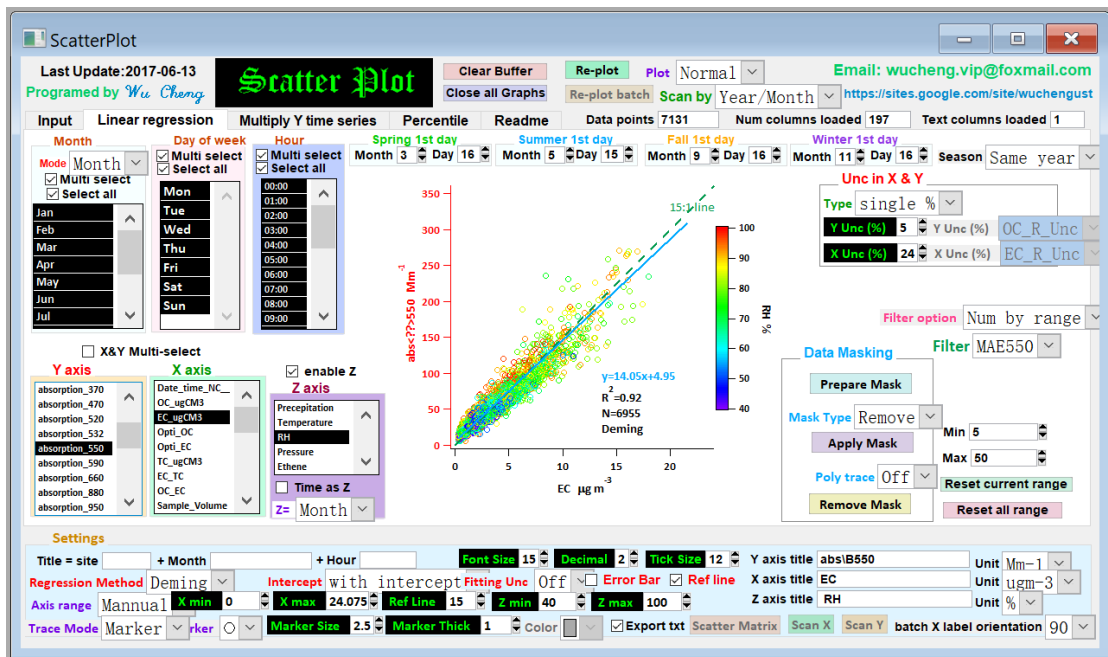

Figure S19. Scatter plot program written in Igro Pro (WaveMetrics, Inc. Lake Oswego, OR, USA). Available from <https://sites.google.com/site/wuchengust>.
